# Supplementary material for: Catalytic metallodrugs based on the LaR2C peptide target HCV SLIV IRES RNA
Source: Royal Society of Chemistry journal article supplement (doi:10.1039/c5dt02837j), 2015-01-01
Supplement: c5dt02837j1.pdf [file c5dt02837j1.pdf]

**SUPPLEMENTARY INFORMATION**

**Catalytic Metallodrugs Based on the LaR2C Peptide Target HCV SLIV IRES RNA**

Martin James Ross<sup>1</sup>, Seth S. Bradford<sup>1</sup>, and J. A. Cowan<sup>1,2\*</sup>

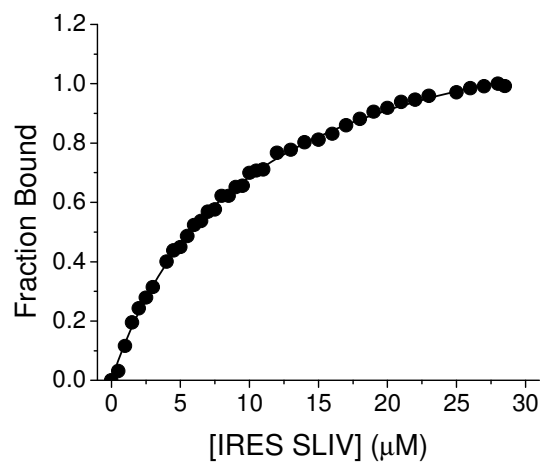

**Figure SM1.** Sample curve for binding of **3** to HCV IRES SLIV.

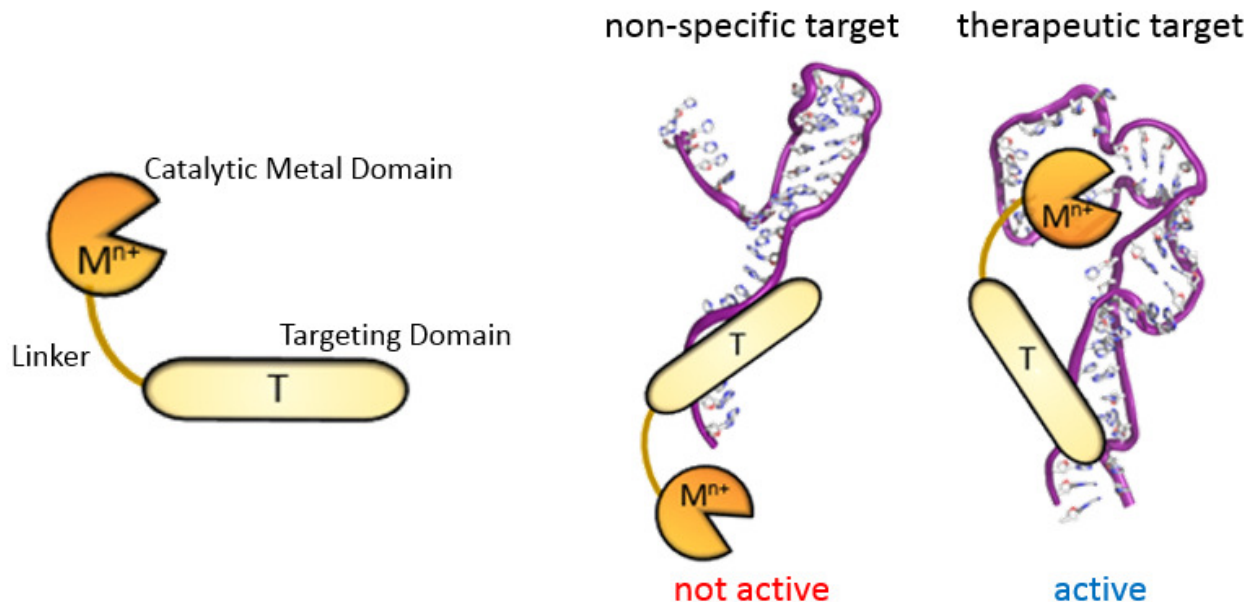

**Figure SM2.** The principle of the double-filter effect. (Left) graphical representation of a metalloprotein, depicting the catalytic metal domain (Cu-GGH moiety), and a generic targeting domain. (Middle and right) Binding of the targeting domain to two different RNAs. Even though both show binding, it is only the target on the right that is subject to irreversible cleavage and inactivation. This results from the positioning of the catalytic metal domain to perform chemistry on the target, but not on the alternative RNA. Use of lower concentrations will favor destruction of the therapeutic target and minimize reversible inhibition of the alternative RNA motif. In both of these cases the compound acts a reversible inhibitor until cleavage occurs.

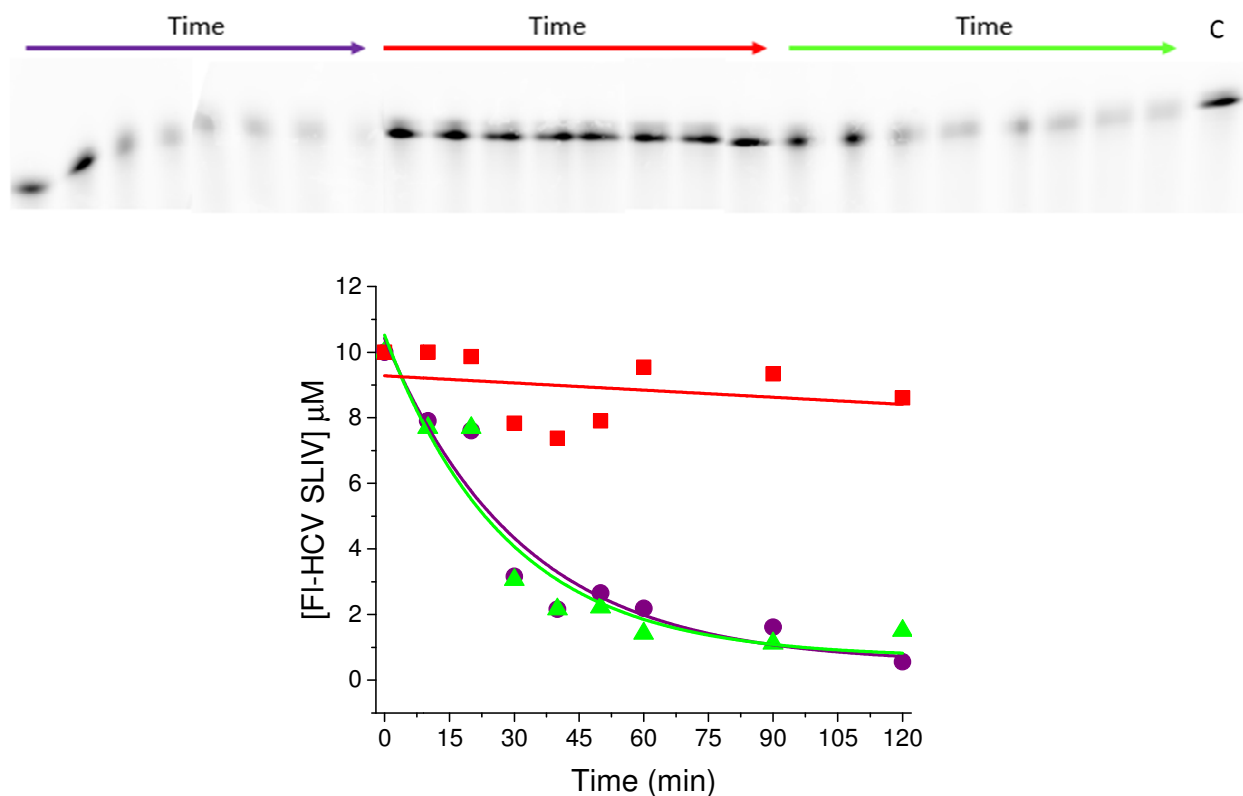

**Figure SM3.** Disappearance of full-length Fl-HCV-SLIV with 2-Cu in the presence of ascorbic acid and hydrogen peroxide (top left, purple arrow), co-reagents only (top middle, red arrow), or 3-Cu with co-reagents (top right, green arrow). The control lane (C) is shown on the on the far right. The time points for each data set were (left to right) 10, 20, 30, 40, 50, 60, 90, and 120 min. Reaction conditions included 10 μM RNA and 10 μM complex with 1 mM ascorbic acid and 1 mM hydrogen peroxide. (Bottom) Graphical representation of the disappearance of the full-length Fl-HCV SLIV, 2-Cu (purple circles), 3-Cu (green triangles), and co-reagents only (red squares).

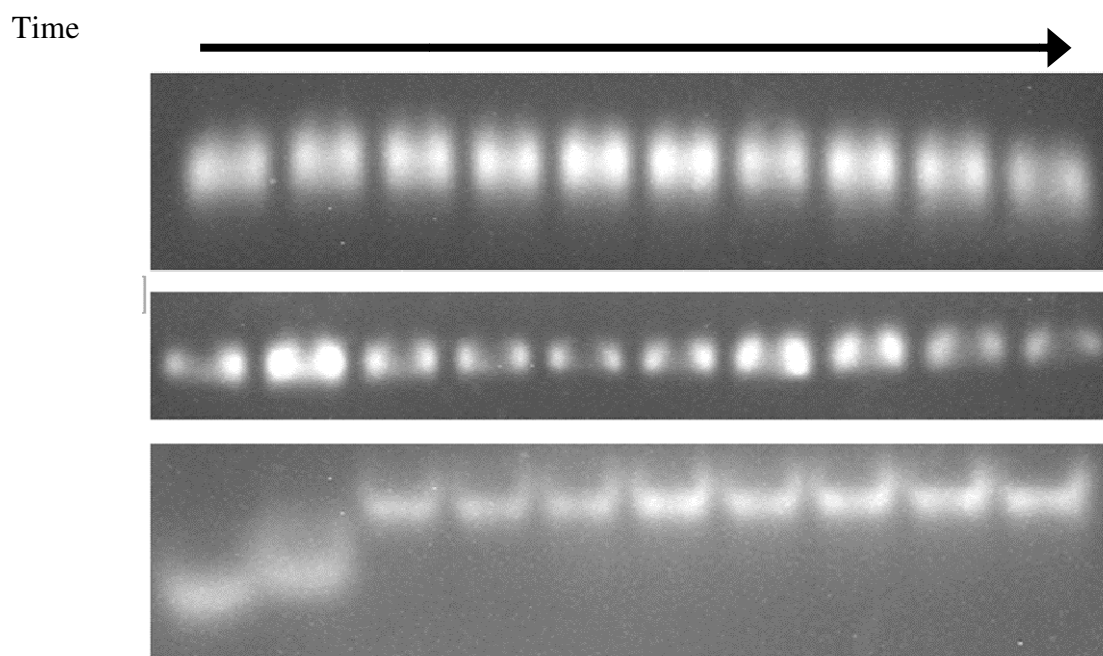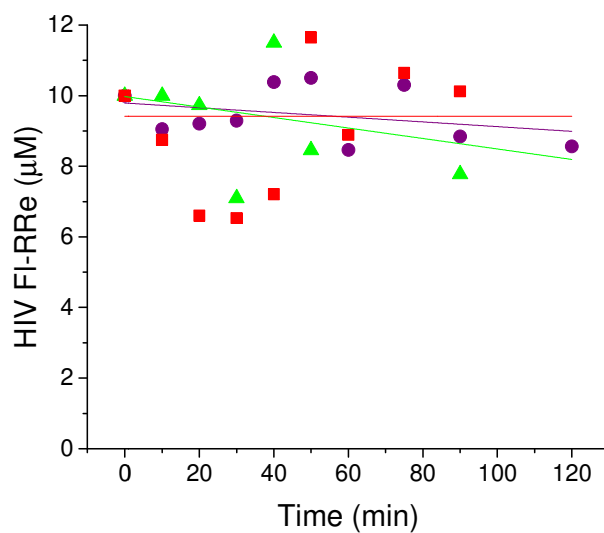

**Figure SM4.** Reactivity of co-reagents with FI-HIV-RRE in the presence and absence of either **2-Cu** or **3-Cu**. Lanes from left to right: control, 10, 20, 30, 40, 50, 60, 75, 90, 120 min. (Top) RNA with co-reagents and **2-Cu**; (middle) RNA with co-reagents and **3-Cu**; (bottom) FI-HIV-RRE with co-reagents. (Bottom) Graphical representation of the disappearance of full-length FI-HIV RRE, **2-Cu** (purple circles), **3-Cu** (green triangles), and co-reagents only (red squares).

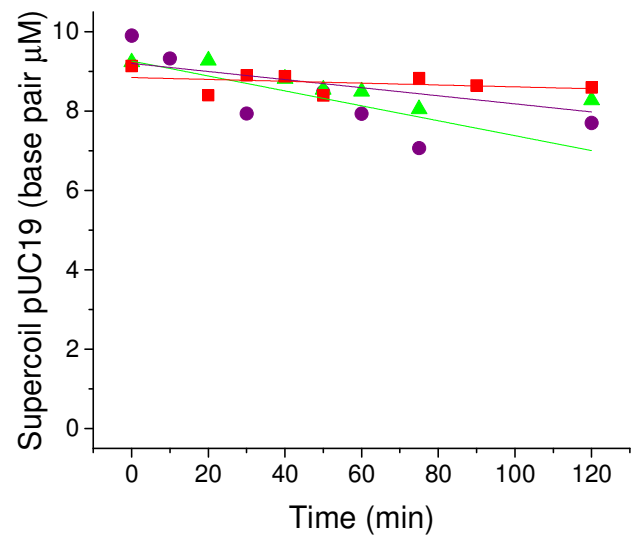

**Figure SM5.** Reactivity of co-reagents with 10  $\mu\text{M}$  bp supercoiled pUC19 in the presence and absence of either **2-Cu** or **3-Cu**. Graphical representation of the disappearance of pUC19, **2-Cu** (purple circles), **3-Cu** (green triangles), and co-reagents only (red squares).

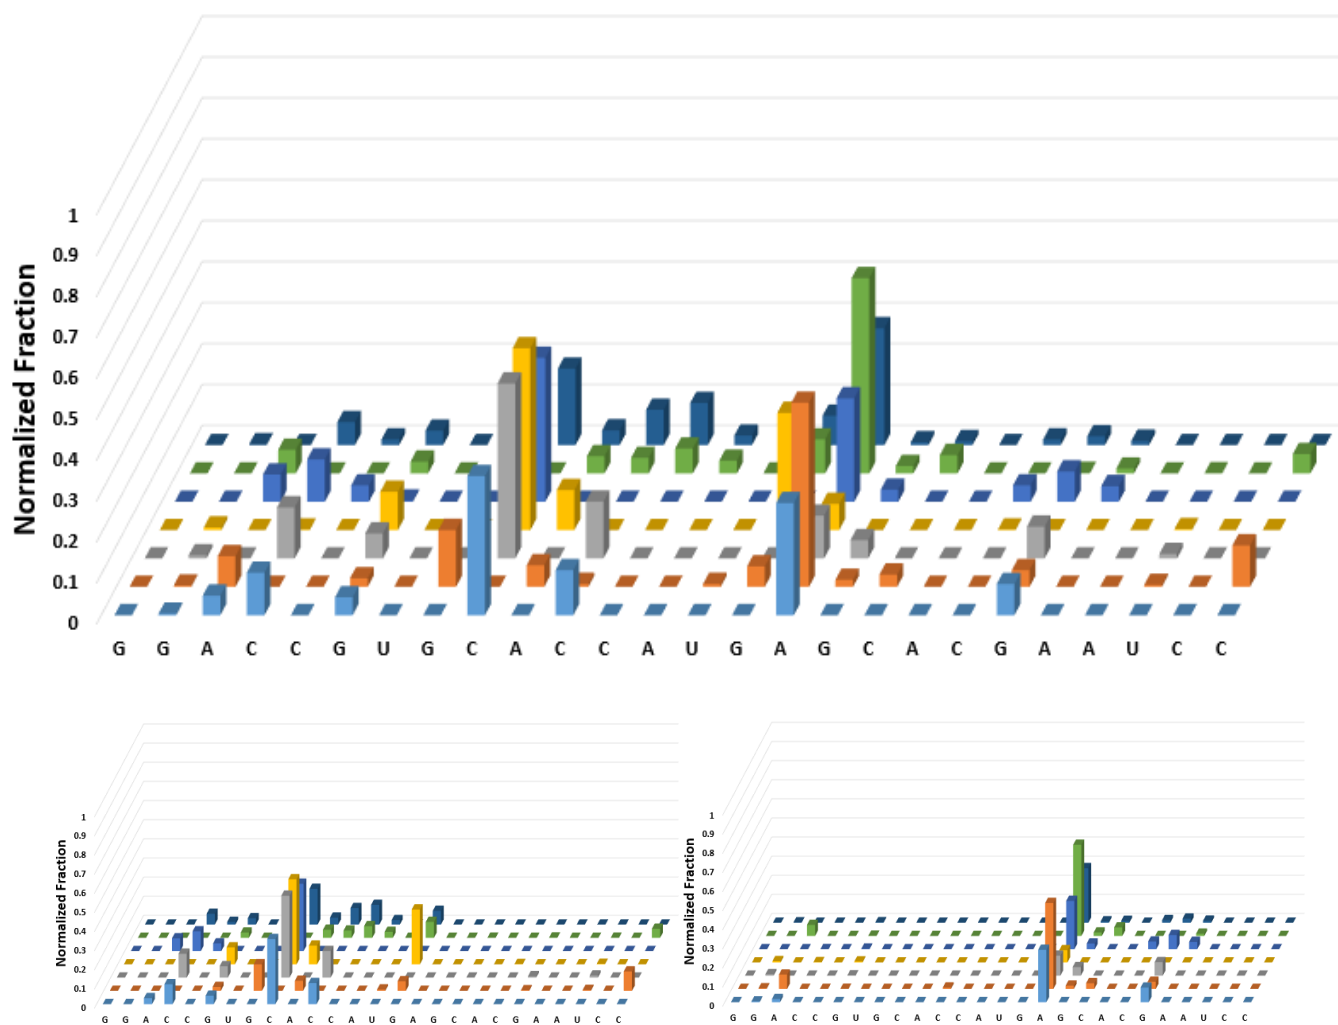

**Figure SM6.** (Top) Time dependence of MALDI-TOF chromatograms for reactions promoted by **2**-Cu with FI-SLIV in the presence of coreagents. Time points from front to back include 2, 10, 20, 30, 45, 60, 90 min. The y-axis is the normalized fraction of the total intensity at each time point and does not account for mass bias. (Bottom left) Shows the contribution of the 3'-overhangs (2'/3'-phosphates, 2',3'-cyclic phosphates, 3'-OH, 3'-phosphoglycolates, 3'-enol/aldehydes, and 3'-a-B). (Bottom right) Shows the contribution of the 5'-overhangs (5'-OH/aldehydes, 5'-phosphates, and 5'-z). Figure SM9 shows structures of the different overhangs discussed.

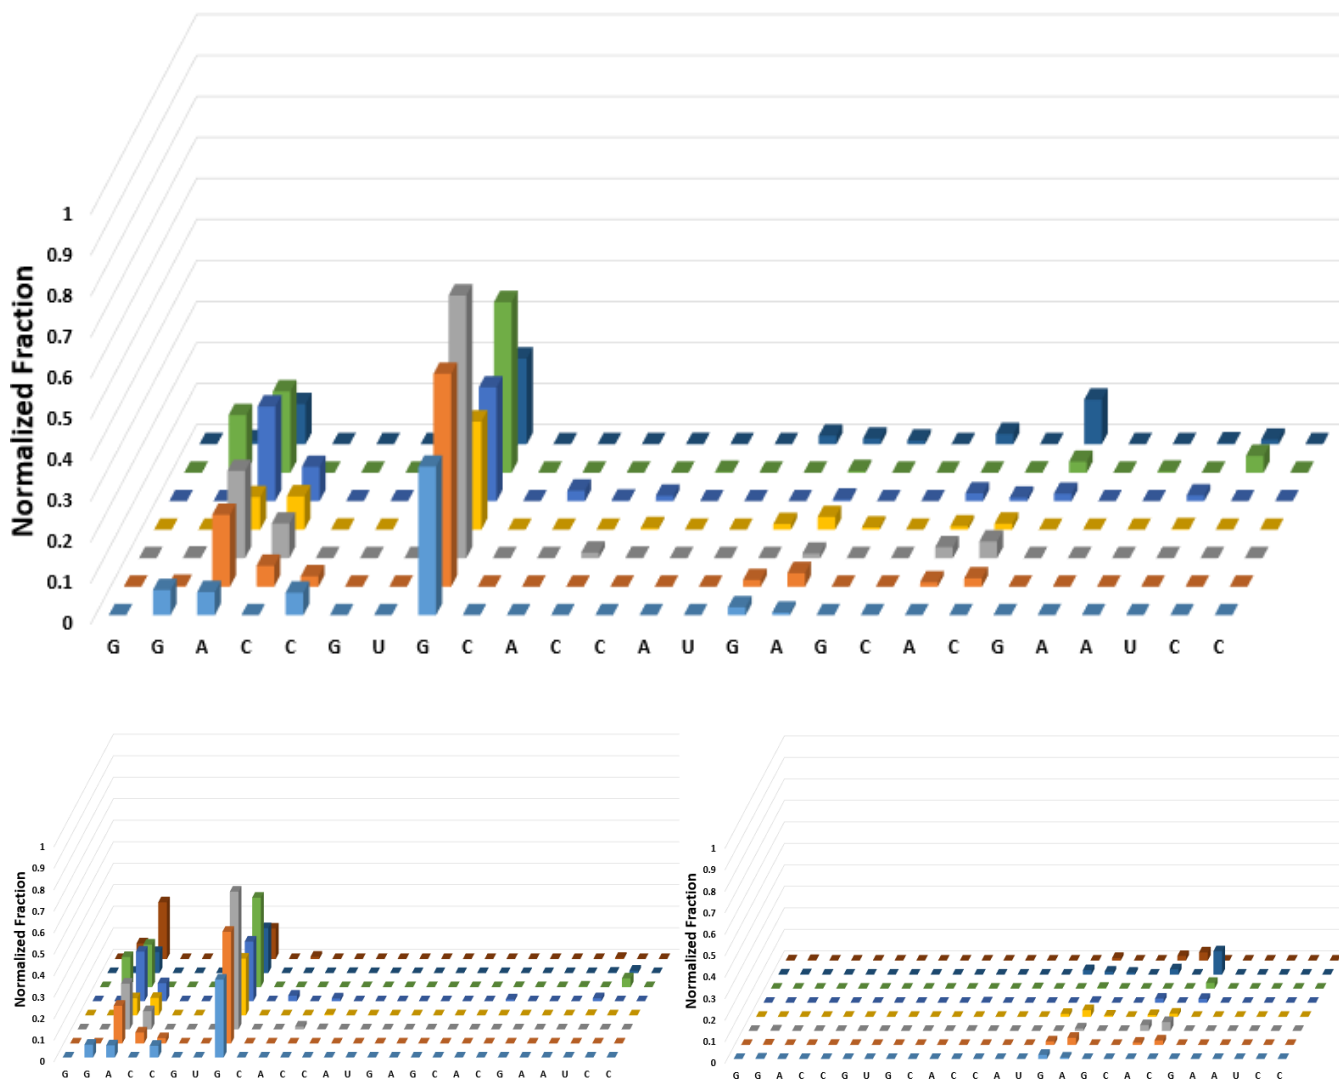

**Figure SM7.** (Top) Time dependence of MALDI-TOF chromatograms for reactions promoted by **3**-Cu with FI-SLIV in the presence of coreagents. Time points from front to back include 2, 10, 20, 30, 45, 60, and 90 min. The y-axis is the normalized fraction of the total intensity at each time point and does not account for mass bias. (Bottom left) The contribution of the 3'-overhangs (2'/3'-phosphates, 2',3'-cyclic phosphates, 3'-OH, 3'-phosphoglycolates, 3'-enol/aldehydes, and 3'-a-B). (Bottom right) The contribution of the 5'-overhangs (5'-OH/aldehydes, 5'-phosphates, and 5'-z). Figure SM9 shows structures of the different overhangs discussed.



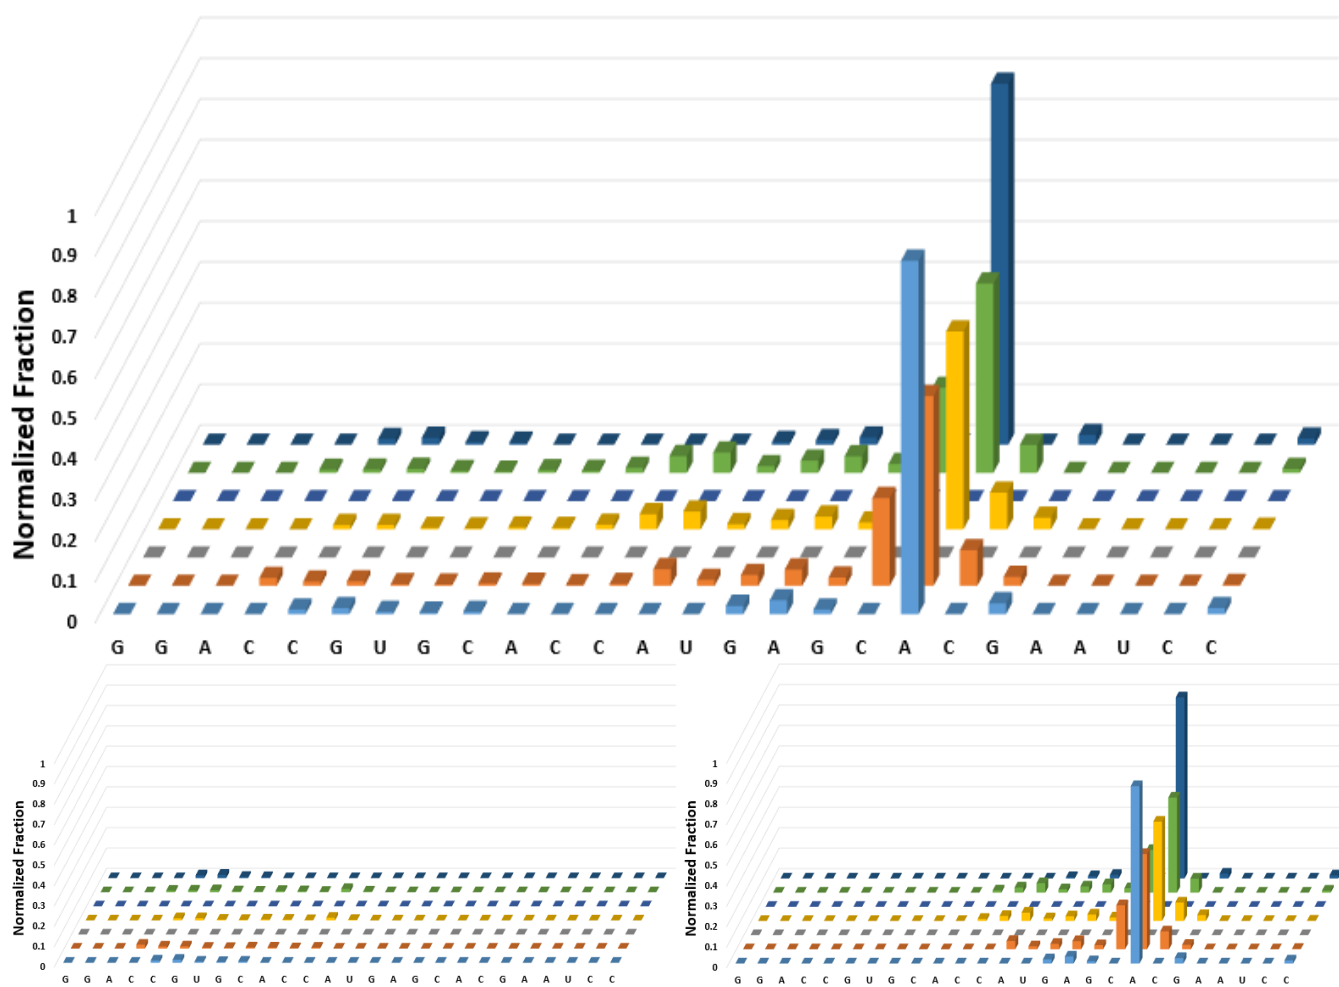

**Figure SM8.** (Top) Time dependence MALDI-TOF chromatogram of Fl-SLIV in the presence of coreagents. Time points from front to back include 2, 10, 20, 30, 45, 60, and 90 min. The y-axis is the normalized fraction of the total intensity at each time point and does not account for mass bias. (Bottom left) The contribution of the 3'-overhangs (2'/3'-phosphates, 2',3'-cyclic phosphates, 3'-OH, 3'-phosphoglycolates, 3'-enol/aldehydes, and 3'-a-B). (Bottom right) The contribution of the 5'-overhangs (5'-OH/aldehydes, 5'-phosphates, and 5'-z). Figure SM9 shows structures of the different overhangs discussed.

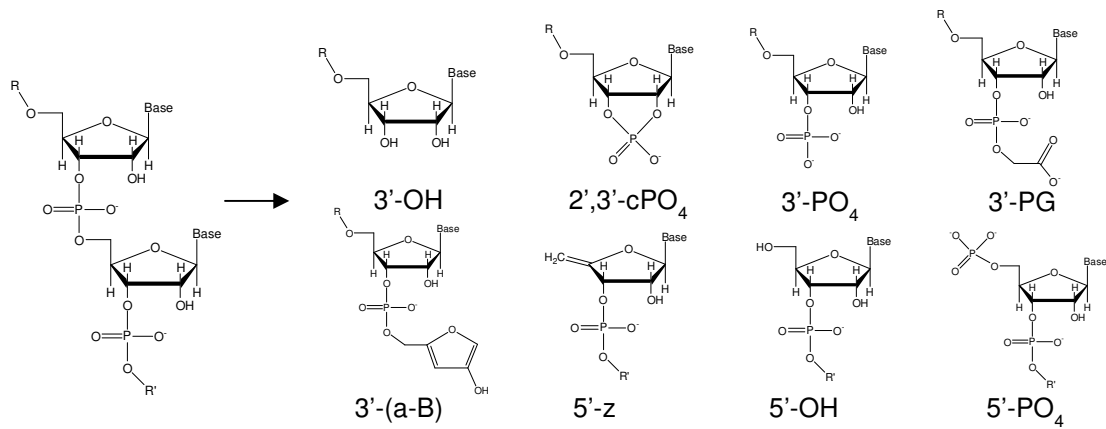

**Figure SM9.** Expected RNA overhangs based on known DNA cleavage pathways.

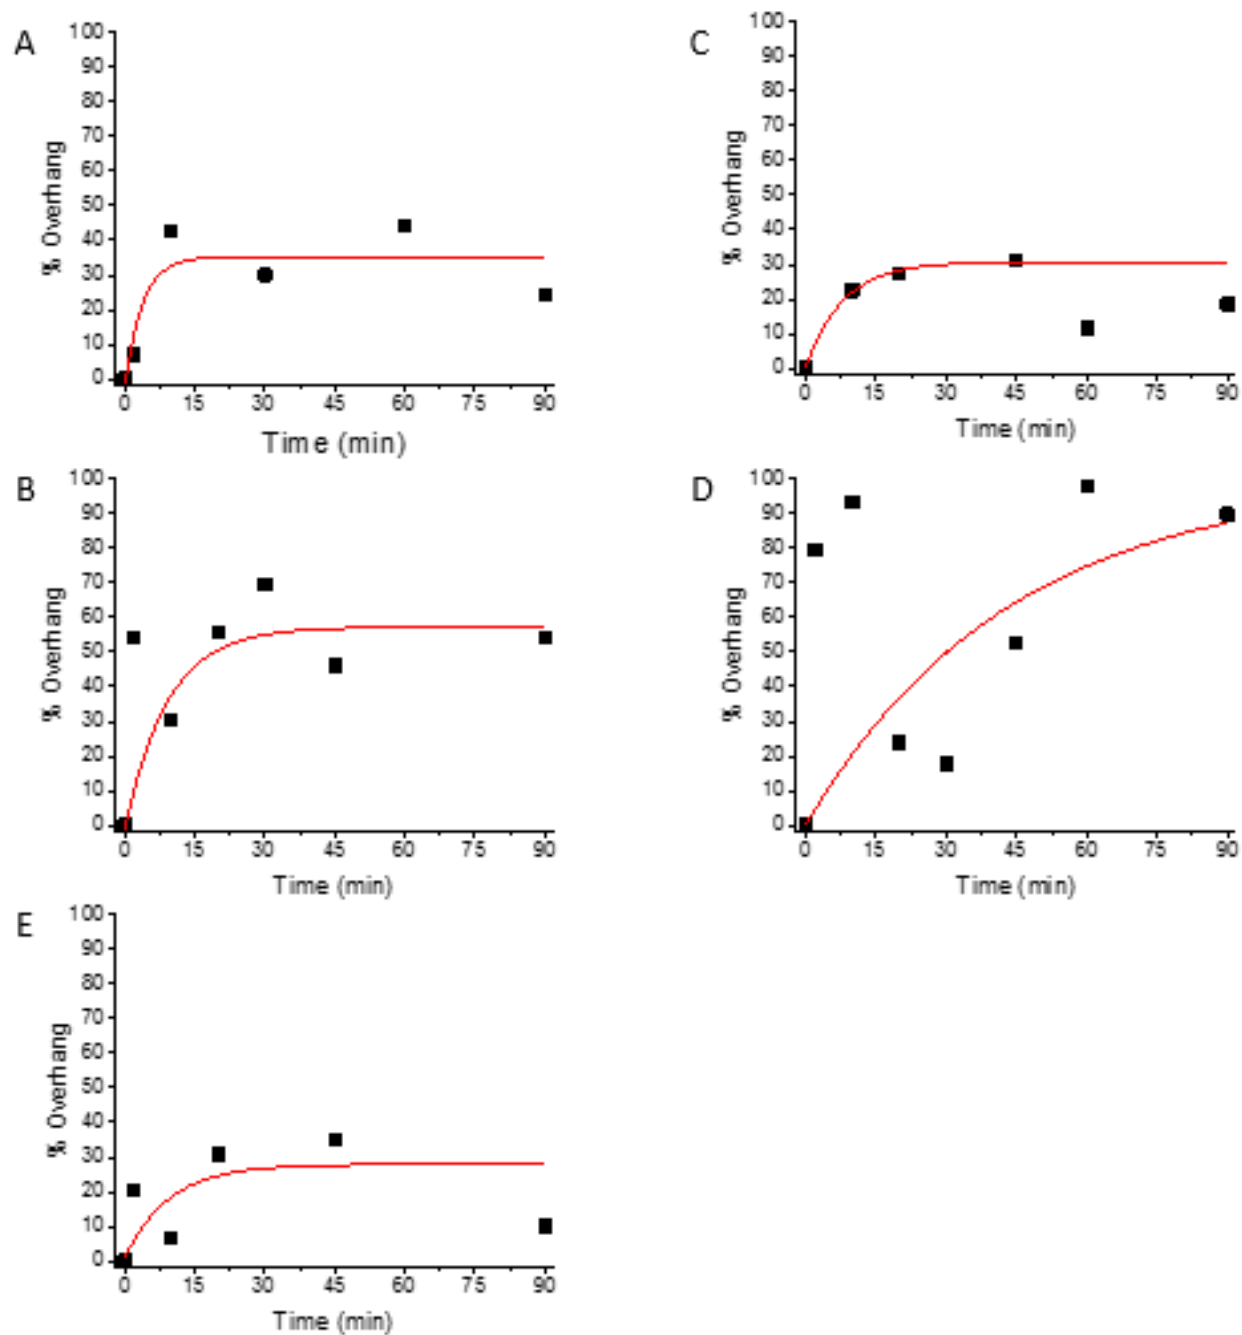

**Figure SM10.** Variation of overhang with time as determined for 2-Cu and HCV SLIV from time-dependent MALDI-MS analysis; (A) 2',3'-cyclic phosphates, (B) 3'-phosphates, (C) 3'-phosphoglycolates, (D) 5'-hydroxyls, (E) 5'- phosphates.

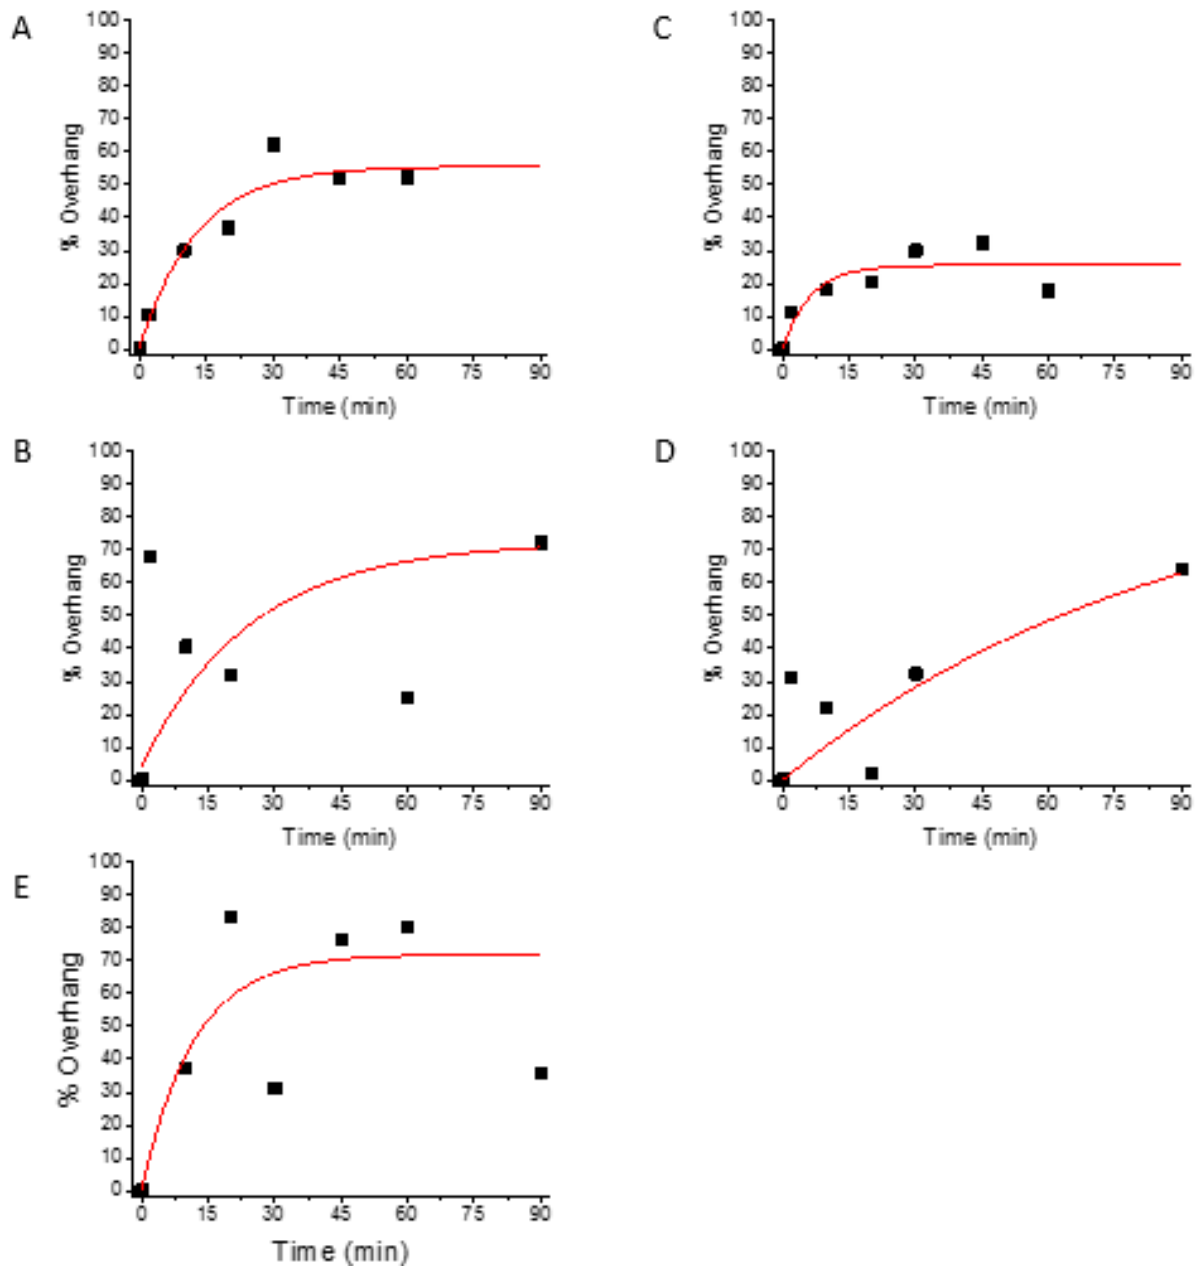

**Figure SM11.** Variation in overhang with time as determined for 3-Cu and HCV SLIV from time-dependent MALDI-MS analysis; (A) 2',3'-cyclic phosphates, (B) 3'-phosphates, (C) 3'-phosphoglycolates, (D) 5'-hydroxyls, (E) 5'-phosphates.

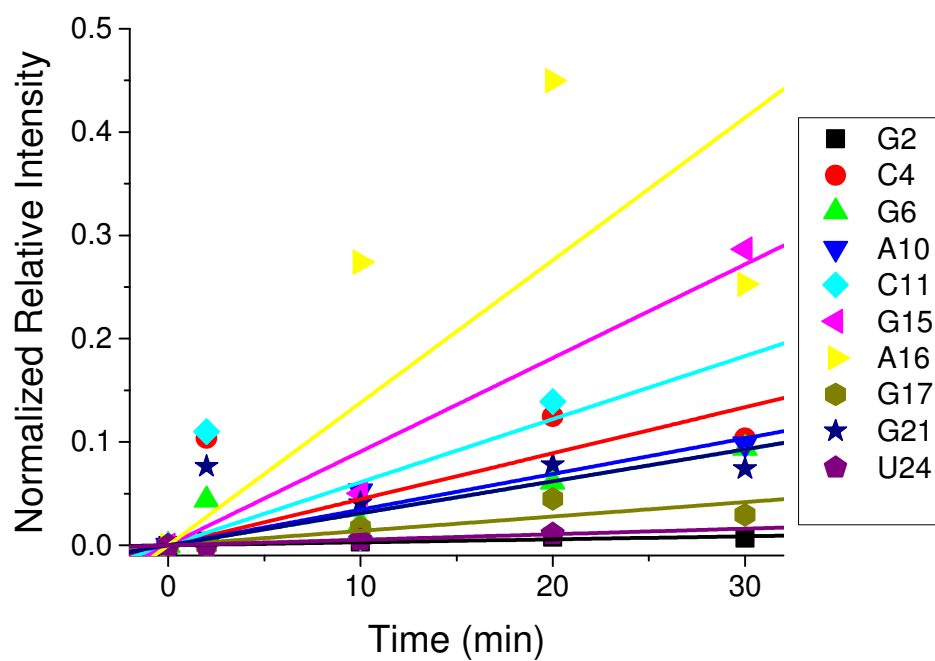

**Figure SM12.** Change in relative normalized intensity with time, at each overhang position, determined for the reactivity of **2**-Cu toward HCV SLIV from analysis of the time-dependence of MALDI-MS peak intensities. Linear fits to determine relative initial rates are included.

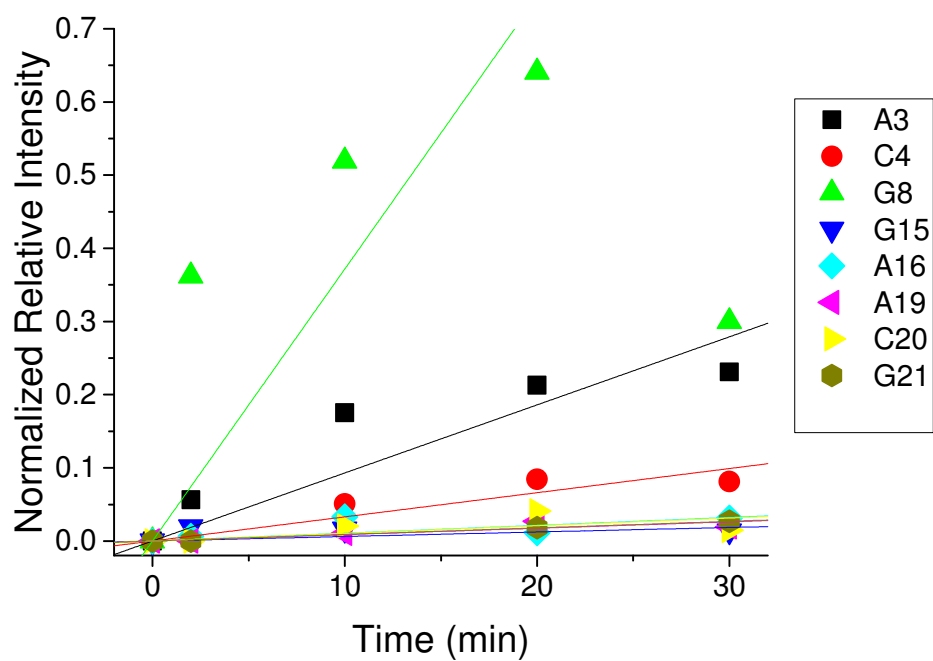

**Figure SM13.** Change in relative normalized intensity with time, at each overhang position, determined for the reactivity of **3**-Cu toward HCV SLIV from analysis of the time-dependence of MALDI-MS peak intensities. Linear fits to determine relative initial rates are included.

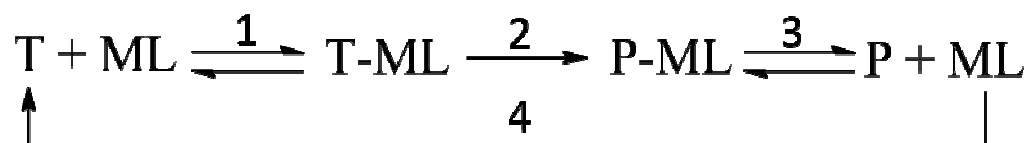

1. Binding affinity to target
2. Effectiveness in facilitating chemistry
3. Release of catalyst
4. Turnover

**Figure SM14.** A summary of the properties expected to contribute to and influence the effectiveness of catalytic metallodrugs. Unlike traditional drugs, the binding affinity to the target is only one of the factors that influence the effectiveness of the catalytic drug. Importantly, there needs to be a balance between the affinity to the target and the release of the therapeutic agent from the modified target.

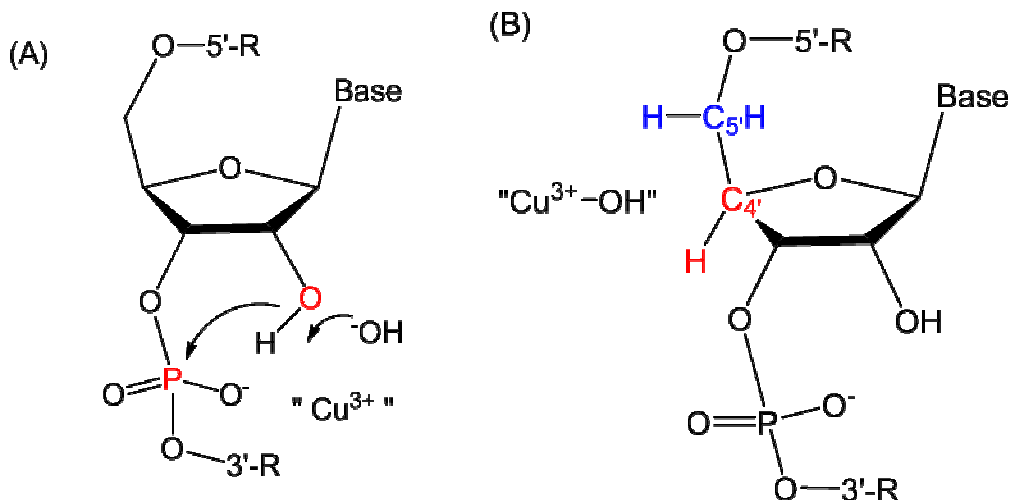

**Figure SM15.** Under oxidative conditions, catalysts can promote RNA cleavage chemistry either through “hydrolytic” (A) or “oxidative” (B) mechanisms promoted through the transient formation of higher valent  $\text{Cu}^{3+}$ . The illustration shows initial intermediates proposed for RNA cleavage mechanisms. The requirement for redox coreagents to effect cleavage supports the requirement for  $\text{Cu}^{3+}$  formation and transient intermediates are shown that invoke either a role as Lewis acid in a classical hydrolytic mechanism involving a cyclic phosphate ester (A), where the  $\text{Cu}^{3+}$  promotes formation of an outer or inner sphere hydroxide that deprotonates the 2'-hydroxyl and/or stabilizes the build-up of negative charge density in the transition state of cyclic phosphate ester formation; or (B), by an oxidative pathway involving a copper-associated reactive oxygen species that is positioned to mediate hydrogen abstraction from the C4' or C5' hydrogens. For the analogous reactions for oxidative cleavage of DNA, both C4'-H or C5'-H hydrogen abstraction are most common, though the oligonucleotide 3'-phosphate product can be observed for oxidative C-H scission at any ribose carbon. For RNA, the oxidative reaction (B) is suggested to most likely occur by C4'-H or C5'-H hydrogen abstraction because these hydrogens are typically the most accessible and the pathways are less compromised by the presence of the C2'-OH. Adopted from Bradford *et al.*<sup>1</sup>



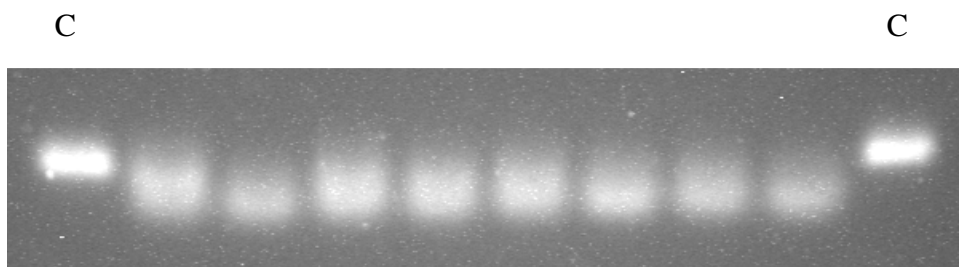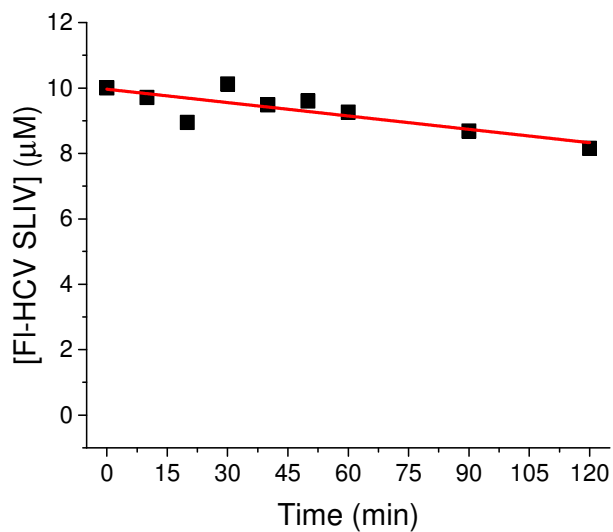

**Figure SM16.** Disappearance of full-length FI-HCV-SLIV with Cu-GGH in the presence of ascorbic acid and hydrogen peroxide. The control lane (C) is shown on the on the far right and far left. The time points for each data set were (left to right) 10, 20, 30, 40, 50, 60, 90, and 120 min. Reaction conditions included 10  $\mu\text{M}$  RNA and 10  $\mu\text{M}$  complex with 1 mM ascorbic acid and 1 mM hydrogen peroxide. (Bottom) Graphical representation of the disappearance of the full-length FI-HCV SLIV. Initial rate of disappearance was determined to be  $13 \pm 2$  nM/min.

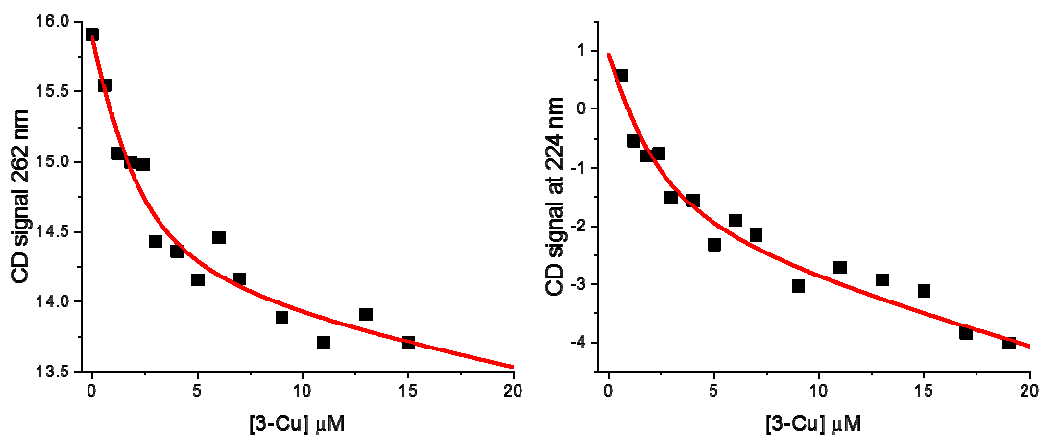

**Figure SM 17.** CD Titration of **3-Cu** with 2.5 μM HCV SLIV at selected wavelengths (262 nm, left and 224 nm, right). The average  $K_D$  was determined to be  $1.2 \pm 0.2$  μM.

**Table SM1.** MALDI-TOF peak global assignments for each time point from the 2-Cu promoted reaction with SLIV in the presences of co-reagents.

| 2 min      |           |                  |          |                        |           |                      |
|------------|-----------|------------------|----------|------------------------|-----------|----------------------|
| Theor Mass | Obsd Mass | Mass Error (ppm) | Position | Overhang               | Peak Area | Normalized Peak Area |
| 7977.89    | 7977.99   | 12.90            | 2        | 5'-OH                  | 140.21    | 0.0039               |
| 1632.15    | 1632.07   | -49.04           | 3        | 3'-phosphoglycolate    | 1125.06   | 0.0313               |
| 7632.68    | 7632.52   | -21.40           | 3        | 5'-OH                  | 595.55    | 0.0166               |
| 1975.37    | 1975.39   | 8.19             | 4        | 3'-a-B                 | 3734.01   | 0.1038               |
| 2511.67    | 2511.55   | -48.61           | 6        | 2',3'-cyclic phosphate | 1577.77   | 0.0438               |
| 3486.24    | 3486.73   | 141.75           | 9        | 3'-phosphate           | 12239.36  | 0.3401               |
| 4178.67    | 4177.58   | -261.49          | 11       | 3'-phosphoglycolate    | 3959.29   | 0.1100               |
| 3471.18    | 3470.55   | -181.25          | 16       | 5'-OH                  | 9862.97   | 0.2741               |
| 1937.17    | 1936.70   | -245.01          | 21       | 5'-phosphate           | 2750.41   | 0.0764               |
| 10 min     |           |                  |          |                        |           |                      |
| Theor Mass | Obsd Mass | Mass Error (ppm) | Position | Overhang               | Peak Area | Normalized Peak Area |
| 8057.87    | 8059.70   | 226.69           | 2        | 5'-phosphate           | 108.50    | 0.0032               |
| 7632.68    | 7633.42   | 96.55            | 3        | 5'-OH                  | 2558.92   | 0.0750               |
| 2511.67    | 2511.92   | 101.17           | 6        | 2',3'-cyclic phosphate | 696.12    | 0.0204               |
| 6693.11    | 6694.94   | 273.32           | 6        | 5'-OH                  | 26.40     | 0.0008               |
| 3163.05    | 3162.25   | -252.23          | 8        | 2',3'-cyclic phosphate | 2848.47   | 0.0835               |
| 3181.06    | 3180.47   | -185.89          | 8        | 3'-phosphate           | 1889.24   | 0.0554               |
| 3815.45    | 3815.06   | -102.18          | 10       | 3'-phosphate           | 1797.83   | 0.0527               |
| 5062.13    | 5060.80   | -262.24          | 11       | 5'-OH                  | 245.54    | 0.0072               |
| 5061.19    | 5060.80   | -76.56           | 14       | 3'-phosphate           | 245.54    | 0.0072               |
| 5388.39    | 5387.54   | -157.26          | 15       | 2',3'-cyclic phosphate | 1714.60   | 0.0503               |
| 3471.18    | 3470.57   | -175.79          | 16       | 5'-OH                  | 15345.22  | 0.4498               |
| 3141.97    | 3142.78   | 258.18           | 17       | 5'-OH                  | 585.85    | 0.0172               |
| 2796.76    | 2796.76   | 1.31             | 18       | 5'-OH                  | 1026.97   | 0.0301               |
| 1937.17    | 1936.73   | -227.27          | 21       | 5'-phosphate           | 1281.15   | 0.0376               |
| 7347.59    | 7347.30   | -39.48           | 21       | 2',3'-cyclic phosphate | 116.36    | 0.0034               |
| 8312.18    | 8313.68   | 181.00           | 24       | 2',3'-cyclic phosphate | 168.98    | 0.0050               |
| 8860.57    | 8861.30   | 81.90            | 26       | 3'-OH                  | 3460.01   | 0.1014               |

**20 min**

| <b>Theor Mass</b> | <b>Obsd Mass</b> | <b>Mass Error (ppm)</b> | <b>Position</b> | <b>Overhang</b>        | <b>Peak Area</b> | <b>Normalized Peak Area</b> |
|-------------------|------------------|-------------------------|-----------------|------------------------|------------------|-----------------------------|
| 7977.89           | 7975.79          | -263.53                 | 2               | 5'-OH                  | 170.83           | 0.0079                      |
| 1937.33           | 1936.80          | -274.70                 | 4               | 3'-phosphoglycolate    | 1530.67          | 0.0709                      |
| 1975.37           | 1975.83          | 231.98                  | 4               | 3'-a-B                 | 1164.63          | 0.0539                      |
| 2511.67           | 2511.44          | -89.78                  | 6               | 2',3'-cyclic phosphate | 1285.11          | 0.0595                      |
| 6693.11           | 6692.58          | -79.81                  | 6               | 5'-OH                  | 39.13            | 0.0018                      |
| 3486.24           | 3486.31          | 21.40                   | 9               | 3'-phosphate           | 9239.77          | 0.4278                      |
| 4178.67           | 4177.79          | -210.91                 | 11              | 3'-phosphoglycolate    | 3008.07          | 0.1393                      |
| 3453.17           | 3453.48          | 89.35                   | 16              | 5'-z                   | 2261.79          | 0.1047                      |
| 3141.97           | 3141.94          | -8.41                   | 17              | 5'-OH                  | 972.75           | 0.0450                      |
| 1937.17           | 1936.80          | -190.58                 | 21              | 5'-phosphate           | 1530.67          | 0.0709                      |
| 7347.59           | 7347.15          | -60.06                  | 21              | 2',3'-cyclic phosphate | 153.88           | 0.0071                      |
| 8312.18           | 8311.82          | -43.72                  | 24              | 2',3'-cyclic phosphate | 238.61           | 0.0110                      |

**30 min**

| <b>Theor Mass</b> | <b>Obsd Mass</b> | <b>Mass Error (ppm)</b> | <b>Position</b> | <b>Overhang</b>        | <b>Peak Area</b> | <b>Normalized Peak Area</b> |
|-------------------|------------------|-------------------------|-----------------|------------------------|------------------|-----------------------------|
| 7977.89           | 7978.53          | 80.63                   | 2               | 5'-OH                  | 353.36           | 0.0070                      |
| 7303.47           | 7302.64          | -113.84                 | 4               | 5'-OH                  | 73.01            | 0.0014                      |
| 2511.67           | 2511.50          | -67.54                  | 6               | 2',3'-cyclic phosphate | 4504.17          | 0.0887                      |
| 6693.11           | 6693.24          | 20.00                   | 6               | 5'-OH                  | 265.06           | 0.0052                      |
| 3486.24           | 3486.63          | 111.01                  | 9               | 3'-phosphate           | 22575.42         | 0.4447                      |
| 3815.45           | 3814.63          | -215.04                 | 10              | 3'-phosphate           | 4971.40          | 0.0979                      |
| 5388.39           | 5387.08          | -243.77                 | 15              | 2',3'-cyclic phosphate | 9483.08          | 0.1868                      |
| 5406.40           | 5405.03          | -254.23                 | 15              | 3'-phosphate           | 5067.30          | 0.0998                      |
| 3453.17           | 3453.98          | 234.25                  | 16              | 5'-z                   | 3251.93          | 0.0641                      |
| 7002.38           | 7002.22          | -23.49                  | 20              | 2',3'-cyclic phosphate | 90.17            | 0.0018                      |
| 8250.21           | 8250.30          | 11.21                   | 24              | 3'-OH                  | 129.45           | 0.0025                      |

**45 min**

| <b>Theor Mass</b> | <b>Obsd Mass</b> | <b>Mass Error (ppm)</b> | <b>Position</b> | <b>Overhang</b>     | <b>Peak Area</b> | <b>Normalized Peak Area</b> |
|-------------------|------------------|-------------------------|-----------------|---------------------|------------------|-----------------------------|
| 1632.15           | 1632.19          | 20.19                   | 3               | 3'-phosphoglycolate | 1332.04          | 0.0407                      |
| 1670.19           | 1669.74          | -270.47                 | 3               | 3'-a-B              | 845.60           | 0.0258                      |
| 1975.37           | 1975.21          | -83.41                  | 4               | 3'-a-B              | 3375.83          | 0.1032                      |
| 7303.47           | 7302.32          | -157.22                 | 4               | 5'-OH               | 11.61            | 0.0004                      |

|         |         |         |    |                     |         |        |
|---------|---------|---------|----|---------------------|---------|--------|
| 2242.51 | 2242.32 | -88.22  | 5  | 3'-phosphoglycolate | 1316.72 | 0.0402 |
| 6693.11 | 6692.69 | -62.89  | 6  | 5'-OH               | 92.58   | 0.0028 |
| 3486.24 | 3486.94 | 201.20  | 9  | 3'-phosphate        | 8455.90 | 0.2585 |
| 3544.28 | 3543.45 | -233.94 | 9  | 3'-phosphoglycolate | 3058.81 | 0.0935 |
| 3471.18 | 3470.37 | -232.85 | 16 | 5'-OH               | 6458.36 | 0.1974 |
| 3453.17 | 3453.59 | 122.40  | 16 | 5'-z                | 1811.80 | 0.0554 |
| 3141.97 | 3142.72 | 239.85  | 17 | 5'-OH               | 964.61  | 0.0295 |
| 2242.35 | 2242.32 | -15.53  | 20 | 5'-phosphate        | 1316.72 | 0.0402 |
| 1937.17 | 1936.70 | -240.91 | 21 | 5'-phosphate        | 2426.28 | 0.0742 |
| 1591.96 | 1592.23 | 171.24  | 22 | 5'-phosphate        | 1250.02 | 0.0382 |

### 60 min

| Theor Mass | Obsd Mass | Mass Error (ppm) | Position | Overhang               | Peak Area | Normalized Peak Area |
|------------|-----------|------------------|----------|------------------------|-----------|----------------------|
| 7632.68    | 7631.88   | -104.32          | 3        | 5'-OH                  | 4603.02   | 0.0577               |
| 2511.67    | 2511.80   | 49.83            | 6        | 2',3'-cyclic phosphate | 2201.31   | 0.0276               |
| 6693.11    | 6693.21   | 15.57            | 6        | 5'OH                   | 99.49     | 0.0012               |
| 3163.05    | 3162.45   | -189.21          | 8        | 2',3'-cyclic phosphate | 4503.11   | 0.0564               |
| 3815.45    | 3815.17   | -72.96           | 10       | 3'-phosphate           | 3355.86   | 0.0421               |
| 4178.67    | 4179.35   | 162.37           | 11       | 3'-phosphoglycolate    | 3015.34   | 0.0378               |
| 4467.85    | 4467.09   | -170.88          | 12       | 3'-enol/aldehyde       | 4856.58   | 0.0609               |
| 4755.02    | 4755.47   | 95.30            | 13       | 3'-phosphate           | 2489.12   | 0.0312               |
| 5388.39    | 5387.85   | -100.48          | 15       | 2',3'-cyclic phosphate | 4786.66   | 0.0600               |
| 5406.40    | 5406.55   | 27.71            | 15       | 3'-phosphate           | 1861.22   | 0.0233               |
| 3471.18    | 3470.48   | -201.59          | 16       | 5'-OH                  | 38085.95  | 0.4774               |
| 3141.97    | 3141.66   | -99.17           | 17       | 5'-OH                  | 1451.17   | 0.0182               |
| 2796.76    | 2796.54   | -80.15           | 18       | 5'-OH                  | 3562.47   | 0.0447               |
| 6367.99    | 6368.51   | 82.30            | 18       | 2',3'-cyclic phosphate | 24.28     | 0.0003               |
| 7347.59    | 7348.36   | 104.73           | 21       | 2',3'-cyclic phosphate | 98.34     | 0.0012               |
| 1591.96    | 1592.14   | 111.97           | 22       | 5'-phosphate           | 954.51    | 0.0120               |
| 8250.21    | 8249.58   | -76.27           | 24       | 3'-OH                  | 49.97     | 0.0006               |
| 8860.57    | 8861.67   | 123.73           | 26       | 3'-OH                  | 3780.34   | 0.0474               |

### 90 min

| Theor Mass | Obsd Mass | Mass Error (ppm) | Position | Overhang            | Peak Area | Normalized Peak Area |
|------------|-----------|------------------|----------|---------------------|-----------|----------------------|
| 7977.89    | 7977.80   | -10.93           | 2        | 5'-OH               | 114.20    | 0.0016               |
| 1937.33    | 1936.89   | -229.50          | 4        | 3'-phosphoglycolate | 1531.99   | 0.0218               |
| 1975.37    | 1975.36   | -5.40            | 4        | 3'-a-B              | 1326.77   | 0.0189               |

|         |         |         |    |                        |          |        |
|---------|---------|---------|----|------------------------|----------|--------|
| 1861.28 | 1861.28 | -1.64   | 4  | 2',3'-cyclic phosphate | 587.69   | 0.0083 |
| 1879.29 | 1879.32 | 16.14   | 4  | 3'-phosphate           | 510.07   | 0.0072 |
| 2242.51 | 2242.21 | -134.79 | 5  | 3'-phosphoglycolate    | 972.87   | 0.0138 |
| 2511.67 | 2511.56 | -45.26  | 6  | 2',3'-cyclic phosphate | 2326.01  | 0.0330 |
| 6693.11 | 6691.69 | -212.16 | 6  | 5'-OH                  | 152.38   | 0.0022 |
| 3163.05 | 3162.11 | -295.64 | 8  | 2',3'-cyclic phosphate | 2625.14  | 0.0373 |
| 3486.24 | 3487.02 | 224.06  | 9  | 3'-phosphate           | 13143.42 | 0.1867 |
| 3815.45 | 3815.02 | -113.38 | 10 | 3'-phosphate           | 2531.31  | 0.0360 |
| 4178.67 | 4178.21 | -110.32 | 11 | 3'-phosphoglycolate    | 2673.34  | 0.0380 |
| 4120.63 | 4120.67 | 10.58   | 11 | 3'-phosphate           | 1973.55  | 0.0280 |
| 4102.62 | 4102.38 | -57.86  | 11 | 2',3'-cyclic phosphate | 1431.46  | 0.0203 |
| 4483.85 | 4484.92 | 238.94  | 12 | 3'-phosphoglycolate    | 3238.32  | 0.0460 |
| 4425.81 | 4426.31 | 113.35  | 12 | 3'-phosphate           | 2507.36  | 0.0356 |
| 4407.80 | 4407.28 | -117.07 | 12 | 2',3'-cyclic phosphate | 1509.98  | 0.0215 |
| 4755.02 | 4755.02 | -0.86   | 13 | 3'-phosphate           | 1650.74  | 0.0235 |
| 5388.39 | 5387.63 | -140.48 | 15 | 2',3'-cyclic phosphate | 2622.08  | 0.0373 |
| 5406.40 | 5405.71 | -128.34 | 15 | 3'-phosphate           | 2429.07  | 0.0345 |
| 3471.18 | 3470.39 | -227.59 | 16 | 5'-OH                  | 20089.61 | 0.2854 |
| 3141.97 | 3141.64 | -103.54 | 17 | 5'-OH                  | 493.55   | 0.0070 |
| 2796.76 | 2796.41 | -126.11 | 18 | 5'-OH                  | 698.09   | 0.0099 |
| 2242.35 | 2242.21 | -62.11  | 20 | 5'-phosphate           | 972.87   | 0.0138 |
| 1937.17 | 1936.89 | -145.38 | 21 | 5'-phosphate           | 1531.99  | 0.0218 |
| 1511.98 | 1511.99 | 3.34    | 22 | 5'-OH                  | 740.56   | 0.0105 |

**Table SM2.** MALDI-TOF peak global assignments for each time point from the 3-Cu promoted reaction with SLIV in the presences of co-reagents

| 2 min      |           |                  |          |                        |           |                      |
|------------|-----------|------------------|----------|------------------------|-----------|----------------------|
| Theor Mass | Obsd Mass | Mass Error (ppm) | Position | Overhang               | Peak Area | Normalized Peak Area |
| 1632.15    | 1632.10   | -35.31           | 3        | 3'-phosphoglycolate    | 520.36    | 0.0593               |
| 7632.68    | 7631.31   | -179.58          | 3        | 5'-OH                  | 118.81    | 0.0021               |
| 1975.37    | 1975.07   | -152.69          | 4        | 3'-a-B                 | 524.76    | 0.0564               |
| 2511.67    | 2511.23   | -176.92          | 6        | 2',3'-cyclic phosphate | 350.47    | 0.0546               |
| 6693.11    | 6692.87   | -36.16           | 6        | 5'-OH                  | 14.14     | 0.0003               |
| 3486.24    | 3485.91   | -94.18           | 9        | 3'-phosphate           | 3196.97   | 0.3624               |
| 3453.17    | 3453.51   | 99.10            | 16       | 5'-z                   | 1328.08   | 0.0194               |
| 3141.97    | 3142.39   | 135.22           | 17       | 5'-OH                  | 367.11    | 0.0064               |
| 10 min     |           |                  |          |                        |           |                      |
| Theor Mass | Obsd Mass | Mass Error (ppm) | Position | Overhang               | Peak Area | Normalized Peak Area |
| 7632.68    | 7634.41   | 226.50           | 3        | 5'-OH                  | 185.77    | 0.0020               |
| 1937.33    | 1937.12   | -107.78          | 4        | 3'-phosphoglycolate    | 1880.90   | 0.0893               |
| 1975.37    | 1975.67   | 150.64           | 4        | 3'-a-B                 | 1719.87   | 0.0862               |
| 2242.51    | 2242.12   | -175.72          | 5        | 3'-phosphoglycolate    | 977.80    | 0.0509               |
| 2511.67    | 2511.71   | 14.22            | 6        | 2',3'-cyclic phosphate | 601.53    | 0.0249               |
| 6693.11    | 6693.76   | 96.78            | 6        | 5'-OH                  | 33.53     | 0.0004               |
| 3486.24    | 3485.38   | -247.77          | 9        | 3'-phosphate           | 6557.81   | 0.3133               |
| 3468.23    | 3469.03   | 231.81           | 9        | 2',3'-cyclic phosphate | 4843.92   | 0.2060               |
| 3453.17    | 3453.09   | -21.87           | 16       | 5'-z                   | 1465.26   | 0.0164               |
| 3123.96    | 3124.79   | 265.15           | 17       | 5'-z                   | 1524.76   | 0.0173               |
| 3141.97    | 3141.83   | -43.31           | 17       | 5'-OH                  | 1471.02   | 0.0159               |
| 2242.35    | 2242.12   | -103.04          | 20       | 5'-phosphate           | 977.80    | 0.0106               |
| 1937.17    | 1937.12   | -23.65           | 21       | 5'-phosphate           | 1880.90   | 0.0206               |
| 20 min     |           |                  |          |                        |           |                      |
| Theor Mass | Obsd Mass | Mass Error (ppm) | Position | Overhang               | Peak Area | Normalized Peak Area |
| 7632.68    | 7632.88   | 26.39            | 3        | 5'-OH                  | 202.60    | 0.0017               |
| 1937.33    | 1937.30   | -18.65           | 4        | 3'-phosphoglycolate    | 4773.50   | 0.1112               |
| 1975.37    | 1975.35   | -11.27           | 4        | 3'-a-B                 | 4393.78   | 0.1017               |
| 2242.51    | 2241.85   | -297.73          | 5        | 3'-phosphoglycolate    | 3223.34   | 0.0845               |
| 3468.23    | 3468.62   | 112.48           | 9        | 2',3'-cyclic phosphate | 17997.33  | 0.3371               |

|         |         |         |    |                        |          |        |
|---------|---------|---------|----|------------------------|----------|--------|
| 3486.24 | 3485.22 | -291.90 | 9  | 3'-phosphate           | 12981.06 | 0.3036 |
| 4407.80 | 4407.93 | 29.74   | 12 | 2',3'-cyclic phosphate | 472.44   | 0.0134 |
| 4738.94 | 4738.30 | -135.98 | 12 | 5'-z                   | 37.14    | 0.0003 |
| 4737.01 | 4738.30 | 271.39  | 13 | 2',3'-cyclic phosphate | 37.14    | 0.0011 |
| 3123.96 | 3124.55 | 189.18  | 17 | 5'-z                   | 1268.99  | 0.0114 |
| 2242.35 | 2241.85 | -225.06 | 20 | 5'-phosphate           | 3223.34  | 0.0269 |
| 1937.17 | 1937.30 | 65.50   | 21 | 5'-phosphate           | 4773.50  | 0.0410 |

### 30 min

| Theor Mass | Obsd Mass | Mass Error (ppm) | Position | Overhang               | Peak Area | Normalized Peak Area |
|------------|-----------|------------------|----------|------------------------|-----------|----------------------|
| 8323.10    | 8323.09   | -1.25            | 1        | 5'-OH                  | 7.29      | 0.0001               |
| 1937.33    | 1937.54   | 108.48           | 4        | 3'-phosphoglycolate    | 1563.45   | 0.0793               |
| 2242.51    | 2242.25   | -118.53          | 5        | 3'-phosphoglycolate    | 890.95    | 0.0491               |
| 2280.55    | 2280.21   | -150.43          | 5        | 3'-a-B                 | 922.51    | 0.0321               |
| 6693.11    | 6693.12   | 1.99             | 6        | 5'-OH                  | 22.62     | 0.0002               |
| 3468.23    | 3468.28   | 13.70            | 9        | 2',3'-cyclic phosphate | 4041.27   | 0.2637               |
| 4737.01    | 4737.20   | 40.55            | 13       | 2',3'-cyclic phosphate | 42.51     | 0.0038               |
| 3453.17    | 3452.17   | -288.85          | 16       | 5'-z                   | 1452.24   | 0.0139               |
| 3141.97    | 3141.23   | -234.92          | 17       | 5'-OH                  | 1978.76   | 0.0181               |
| 3123.96    | 3124.30   | 108.85           | 17       | 5'-z                   | 1344.91   | 0.0130               |
| 2796.76    | 2796.26   | -178.05          | 18       | 5'-OH                  | 603.06    | 0.0056               |
| 2242.35    | 2242.25   | -45.85           | 20       | 5'-phosphate           | 890.95    | 0.0083               |
| 1937.17    | 1937.54   | 192.64           | 21       | 5'-phosphate           | 1563.45   | 0.0147               |
| 8555.39    | 8555.19   | -23.87           | 25       | 3'-OH                  | 21.95     | 0.0014               |

### 45 min

| Theor Mass | Obsd Mass | Mass Error (ppm) | Position | Overhang               | Peak Area | Normalized Peak Area |
|------------|-----------|------------------|----------|------------------------|-----------|----------------------|
| 1937.33    | 1937.78   | 228.78           | 4        | 3'-phosphoglycolate    | 2177.68   | 0.1270               |
| 1975.37    | 1975.37   | -1.77            | 4        | 3'-a-B                 | 1757.59   | 0.1042               |
| 2242.51    | 2241.99   | -234.21          | 5        | 3'-phosphoglycolate    | 1267.00   | 0.0838               |
| 3468.23    | 3467.59   | -185.72          | 9        | 2',3'-cyclic phosphate | 3280.43   | 0.2776               |
| 4102.62    | 4103.11   | 120.12           | 11       | 2',3'-cyclic phosphate | 221.01    | 0.0259               |
| 4738.94    | 4737.92   | -216.03          | 12       | 5'-z                   | 110.85    | 0.0017               |
| 4737.01    | 4737.92   | 191.31           | 13       | 2',3'-cyclic phosphate | 110.85    | 0.0133               |
| 3123.96    | 3123.78   | -58.31           | 17       | 5'-z                   | 269.47    | 0.0042               |



|         |         |         |    |                        |         |        |
|---------|---------|---------|----|------------------------|---------|--------|
| 2242.35 | 2241.99 | -161.54 | 20 | 5'-phosphate           | 1267.00 | 0.0193 |
| 7347.59 | 7345.53 | -280.74 | 21 | 2',3'-cyclic phosphate | 72.67   | 0.0089 |
| 1634.00 | 1633.99 | -6.48   | 22 | 5'-enol/aldehyde       | 1167.88 | 0.0183 |
| 8617.36 | 8616.23 | -131.10 | 25 | 2',3'-cyclic phosphate | 114.83  | 0.0141 |

**60 min**

| <b>Theor Mass</b> | <b>Obsd Mass</b> | <b>Mass Error (ppm)</b> | <b>Position</b> | <b>Overhang</b>        | <b>Peak Area</b> | <b>Normalized Peak Area</b> |
|-------------------|------------------|-------------------------|-----------------|------------------------|------------------|-----------------------------|
| 7977.89           | 7977.38          | -63.76                  | 2               | 5'-OH                  | 32.03            | 0.0003                      |
| 1632.15           | 1632.35          | 121.09                  | 3               | 3'-phosphoglycolate    | 2225.07          | 0.1404                      |
| 1879.29           | 1879.12          | -92.69                  | 4               | 3'-phosphate           | 1335.56          | 0.1984                      |
| 3468.23           | 3467.21          | -293.43                 | 9               | 2',3'-cyclic phosphate | 4800.17          | 0.4161                      |
| 4104.55           | 4104.79          | 59.63                   | 14              | 5'-z                   | 189.43           | 0.0020                      |
| 3123.96           | 3123.29          | -214.84                 | 17              | 5'-z                   | 392.07           | 0.0042                      |
| 7347.59           | 7348.09          | 67.83                   | 21              | 2',3'-cyclic phosphate | 4.16             | 0.0006                      |
| 1591.96           | 1592.36          | 252.28                  | 22              | 5'-phosphate           | 2556.38          | 0.0268                      |
| 8250.21           | 8249.41          | -97.16                  | 24              | 3'-OH                  | 35.40            | 0.0029                      |
| 8860.57           | 8862.18          | 181.59                  | 26              | 3'-OH                  | 494.06           | 0.0411                      |

**90 min**

| <b>Theor Mass</b> | <b>Obsd Mass</b> | <b>Mass Error (ppm)</b> | <b>Position</b> | <b>Overhang</b>        | <b>Peak Area</b> | <b>Normalized Peak Area</b> |
|-------------------|------------------|-------------------------|-----------------|------------------------|------------------|-----------------------------|
| 7977.89           | 7975.88          | -251.96                 | 2               | 5'-OH                  | 19.59            | 0.0004                      |
| 1574.11           | 1573.96          | -93.43                  | 3               | 3'-phosphate           | 69.55            | 0.0059                      |
| 7632.68           | 7631.27          | -184.23                 | 3               | 5'-OH                  | 70.69            | 0.0016                      |
| 1975.37           | 1974.88          | -246.81                 | 4               | 3'-a-B                 | 1611.27          | 0.0756                      |
| 1879.29           | 1879.12          | -89.18                  | 4               | 3'-phosphate           | 246.52           | 0.0212                      |
| 1861.28           | 1860.89          | -209.92                 | 4               | 2',3'-cyclic phosphate | 15.03            | 0.0013                      |
| 3486.24           | 3486.32          | 24.01                   | 9               | 3'-phosphate           | 2375.82          | 0.2089                      |
| 4737.01           | 4737.26          | 52.10                   | 13              | 2',3'-cyclic phosphate | 6.18             | 0.0005                      |
| 3471.18           | 3470.35          | -238.77                 | 16              | 5'-OH                  | 920.37           | 0.0210                      |
| 3141.97           | 3142.23          | 81.19                   | 17              | 5'-OH                  | 600.52           | 0.0140                      |
| 2796.76           | 2796.30          | -166.20                 | 18              | 5'-OH                  | 392.75           | 0.0093                      |
| 2242.35           | 2241.68          | -297.58                 | 20              | 5'-phosphate           | 977.70           | 0.0251                      |
| 1511.98           | 1512.18          | 135.29                  | 22              | 5'-OH                  | 2908.68          | 0.0694                      |
| 1591.96           | 1592.30          | 214.05                  | 22              | 5'-phosphate           | 1497.62          | 0.0394                      |
| 8555.39           | 8554.41          | -113.98                 | 25              | 3'-OH                  | 28.33            | 0.0024                      |
| 8860.57           | 8862.00          | 161.60                  | 26              | 3'-OH                  | 134.50           | 0.0114                      |

## Reference.

1. Bradford, S. S.; Ross, M. J.; Fidai, I.; Cowan, J. A., Insight into the recognition, binding, and reactivity of catalytic metallodrugs targeting stem loop IIb of hepatitis C IRES RNA. *ChemMedChem* **2014**, 9 (6), 1275-85.
